# Supplementary material for: Phospholipid Metabolism Is Associated with Time to HIV Rebound upon Treatment Interruption
Source: PubMed Central journal article supplement (PMC8545116; doi:10.1128/mbio.03444-20), 2021-02-23
Supplement: mbio.03444-20-st001.pdf [file mbio.03444-20-st001.pdf]

**Supplementary Table 1.** Demographic characteristics of the study cohort

| Patient ID | Age (years) | Gender | Race             | Pre-ATI viral load (copies/ml) | Pre-ATI CD4 count (cells/mm <sup>3</sup> ) | Pre-ATI CD4% | Post-ATI viral setpoint (copies/ml) | Time to viral rebound (days) |
|------------|-------------|--------|------------------|--------------------------------|--------------------------------------------|--------------|-------------------------------------|------------------------------|
| S-8        | 53          | Male   | Caucasian        | <50                            | 426                                        | 23.7         | NA                                  | 14                           |
| S-14       | 29          | Male   | Caucasian        | <50                            | 782                                        | 46           | 16153                               | 28                           |
| S-20       | 23          | Male   | African American | <50                            | 708                                        | 37.3         | 3961                                | 28                           |
| S-21       | 40          | Male   | Caucasian        | <50                            | 509                                        | 28.3         | 31674                               | 14                           |
| S-25       | 36          | Female | African American | <50                            | 886                                        | 40.3         | 2693                                | 70                           |
| S-28       | 48          | Male   | Hispanic         | <50                            | 478                                        | 47.8         | 274                                 | 28                           |
| S-29       | 45          | Male   | African American | <50                            | 513                                        | 15.1         | NA                                  | 28                           |
| S-30       | 45          | Male   | Caucasian        | <50                            | 602                                        | 24.1         | NA                                  | 14                           |
| S-31       | 45          | Male   | Caucasian        | <50                            | 712                                        | 28.5         | 6775                                | 27                           |
| S-32       | 41          | Male   | Caucasian        | <50                            | 864                                        | 37.6         | 21961                               | 35                           |
| S-33       | 49          | Female | African American | <50                            | 901                                        | 39.2         | NA                                  | 15                           |
| S-35       | 51          | Male   | Caucasian        | <50                            | 516                                        | 21.5         | 7260                                | 14                           |
| S-36       | 40          | Male   | Caucasian        | <50                            | 517                                        | 39.8         | NA                                  | 35                           |
| S-38       | 42          | Male   | Caucasian        | <50                            | 688                                        | 32.8         | 8460                                | 21                           |
| S-41       | 54          | Male   | Caucasian        | <50                            | 766                                        | 36.5         | 21246                               | 28                           |
| S-42       | 42          | Male   | Caucasian        | <50                            | 734                                        | 36.7         | NA                                  | 14                           |
| S-43       | 50          | Male   | Caucasian        | <50                            | 690                                        | 23.8         | 13675                               | 28                           |
| S-44       | 44          | Male   | Caucasian        | <50                            | 374                                        | 18.7         | 81949                               | 14                           |
| S-49       | 54          | Male   | African American | <50                            | 557                                        | 42.9         | NA                                  | 119                          |
| S-51       | 53          | Male   | Caucasian        | <50                            | 434                                        | 36.2         | 1297                                | 14                           |
| S-54       | 43          | Male   | Caucasian        | <50                            | 832                                        | 34.7         | 21456                               | 14                           |
| S-55       | 38          | Male   | African American | <50                            | 615                                        | 32.4         | NA                                  | 42                           |
| S-60       | 51          | Male   | Caucasian        | <50                            | 669                                        | 39.4         | 16249                               | 21                           |
| S-62       | 48          | Male   | African American | <50                            | 720                                        | 42.4         | 6423                                | 42                           |
