# Supplementary material for: Phospholipid Metabolism Is Associated with Time to HIV Rebound upon Treatment Interruption
Source: PubMed Central journal article supplement (PMC8545116; doi:10.1128/mbio.03444-20), 2021-02-23
Supplement: mbio.03444-20-st002.pdf [file mbio.03444-20-st002.pdf]

**Supplementary Table 2.** Nine hundred sixty-seven lipids identified in this study were assigned to 21 lipid classes.

| <b>Group</b>          | <b>Abbreviation</b> | <b>Class</b>                               | <b>Number of lipids</b> |
|-----------------------|---------------------|--------------------------------------------|-------------------------|
| <b>Phospholipids</b>  | LPA                 | Lysophosphatidic acid                      | 2                       |
|                       | PA                  | Phosphatidic acid                          | 8                       |
|                       | LPC                 | Lysophosphatidylcholine                    | 91                      |
|                       | PC                  | Phosphatidylcholine                        | 173                     |
|                       | LPE                 | Lysophosphatidylethanolamine               | 18                      |
|                       | PE                  | Phosphatidylethanolamine                   | 117                     |
|                       | PG                  | Phosphatidylglycerol                       | 10                      |
|                       | LPI                 | Lysophosphatidylinositol                   | 2                       |
|                       | PI                  | Phosphatidylinositol                       | 46                      |
|                       | PS                  | Phosphatidylserine                         | 2                       |
| <b>Neutral lipids</b> | ChE                 | Cholesterol ester                          | 10                      |
|                       | DG/DAG              | Diglyceride                                | 19                      |
|                       | TG/TAG              | Triglyceride                               | 201                     |
| <b>Sphingolipids</b>  | Cer                 | Ceramide                                   | 58                      |
|                       | Hex1Cer             | Simple Glc series (Ceramide with 1 hexose) | 3                       |
|                       | Hex2Cer             | Simple Glc series (Ceramide with 2 hexose) | 5                       |
|                       | Hex3Cer             | Simple Glc series (Ceramide with 3 hexose) | 4                       |
|                       | LSM                 | Lysosphingomyelin                          | 1                       |
|                       | SM                  | Sphingomyelin                              | 159                     |
| <b>Other lipids</b>   | AcCa                | Acyl carnitine                             | 36                      |
|                       | Co                  | Coenzyme                                   | 2                       |
