# Supplementary material for: Phospholipid Metabolism Is Associated with Time to HIV Rebound upon Treatment Interruption
Source: PubMed Central journal article supplement (PMC8545116; doi:10.1128/mbio.03444-20), 2021-02-23
Supplement: mbio.03444-20-st003.pdf [file mbio.03444-20-st003.pdf]

**Supplementary Table 3.** A list of lipid classes whose pre-ATI levels associate with faster time-to-viral-rebound upon ART cessation.

| Lipid class                  | Group         | Proportional Cox Hazard Model |                                        |                                         |                |            | Mantel Cox Test |            | Spearman's correlation |            |            |
|------------------------------|---------------|-------------------------------|----------------------------------------|-----------------------------------------|----------------|------------|-----------------|------------|------------------------|------------|------------|
|                              |               | HazardRatio (HR)              | HR 95%<br>lower<br>confidence<br>limit | HR 95%<br>higher<br>confidence<br>limit | <i>P</i> value | <i>FDR</i> | <i>P</i> value  | <i>FDR</i> | <i>P</i> value         | <i>FDR</i> | <i>rho</i> |
| Lysophosphatidylethanolamine | Phospholipids | 4.255                         | 1.586                                  | 11.419                                  | 0.004          | 0.028      | 0.006           | 0.064      | 0.002                  | 0.023      | -0.595     |
| Lysophosphatidylcholine      | Phospholipids | 6.340                         | 1.992                                  | 20.181                                  | 0.002          | 0.019      | 0.023           | 0.160      | 0.002                  | 0.023      | -0.608     |
| Lysophosphatidic acid        | Phospholipids | 6.970                         | 2.063                                  | 23.548                                  | 0.002          | 0.019      | 0.040           | 0.212      | 0.006                  | 0.036      | -0.548     |
| Phosphatidylinositol         | Phospholipids | 2.808                         | 1.082                                  | 7.290                                   | 0.034          | 0.147      | ns              |            | 0.014                  | 0.058      | -0.496     |
| Ceramide                     | Sphingolipids | 3.303                         | 1.018                                  | 10.714                                  | 0.047          | 0.147      | 0.002           | 0.042      | 0.007                  | 0.036      | -0.536     |
